# Supplementary material for: Controlling intermolecular spin interactions of La@C82 in empty fullerene matrices
Source: Royal Society of Chemistry journal article supplement (doi:10.1039/b913593f), 2010-01-01
Supplement: b913593f.pdf [file b913593f.pdf]

# Supplementary Information

## Controlling Intermolecular Spin Interactions of La@C<sub>82</sub> in Empty Fullerene Matrices

Yasuhiro Ito,<sup>a</sup> Jamie H. Warner,<sup>a</sup> Richard Brown,<sup>a</sup> Mujtaba Zaka,<sup>a</sup> Rudolf Pfeiffer,<sup>b</sup> Takayuki Aono,<sup>c</sup> Noriko Izumi,<sup>c</sup> Haruya Okimoto,<sup>c</sup> John J. L. Morton,<sup>a,d</sup> Arzhang Ardavan,<sup>d</sup> Hisanori Shinohara,<sup>c</sup> Hans Kuzmany,<sup>b</sup> Herwig Peterlik,<sup>b</sup> and G. Andrew D. Briggs<sup>a</sup>

<sup>a</sup>Department of Materials, Quantum Information Processing Interdisciplinary Research Collaboration (QIP IRC), University of Oxford, Parks Rd, Oxford, OX1 3PH, UK. E-mail: yasuhito.ito@materials.ox.ac.uk

<sup>b</sup>Faculty of Physics, University of Vienna, Strudlhofgasse 4, Vienna, A-1090, Austria

<sup>c</sup>Department of Chemistry and Institute for Advanced Research, Nagoya University, Furo-Cho, Chikusa-ku, Nagoya, 464-8602, Japan

<sup>d</sup>Centre for Advanced Electron Spin Resonance (CAESR), Clarendon Laboratory, Department of Physics, University of Oxford, Parks Rd, Oxford, OX1 3PU, UK

|                              | in C <sub>60</sub> |                                                      |                                                      | in C <sub>70</sub> |       |       | in C <sub>78</sub> |       |       |
|------------------------------|--------------------|------------------------------------------------------|------------------------------------------------------|--------------------|-------|-------|--------------------|-------|-------|
| Concentration<br>( mol% )    | 0.1                | 0.5                                                  | 1                                                    | 0.1                | 0.5   | 1     | 0.1                | 0.5   | 1     |
| FWHM LW<br>( mT )            | 0.098              | 0.102                                                | 0.102                                                | 0.076              | 0.088 | 0.090 | 0.075              | 0.088 | 0.090 |
| Exchange frequency<br>( Hz ) | $4.5 \times 10^5$  | $9.0 \times 10^6$ (58 %)<br>$4.5 \times 10^5$ (42 %) | $9.0 \times 10^6$ (58 %)<br>$4.5 \times 10^5$ (42 %) | $4.5 \times 10^5$  |       |       | $4.5 \times 10^5$  |       |       |
|                              | in C <sub>82</sub> |                                                      |                                                      | in C <sub>84</sub> |       |       |                    |       |       |
| Concentration<br>( mol% )    | 0.1                | 0.5                                                  | 1                                                    | 0.1                | 0.5   | 1     |                    |       |       |
| FWHM LW<br>( mT )            | 0.050              | 0.072                                                | 0.075                                                | 0.073              | 0.081 | 0.082 |                    |       |       |
| Exchange frequency<br>( Hz ) | $4.5 \times 10^5$  |                                                      |                                                      | $4.5 \times 10^5$  |       |       |                    |       |       |

**Table S1** Numerical data of the simulated ESR spectra of La@C<sub>82</sub> in C<sub>2n</sub> matrices. Anisotropic *g* and *a* tensor, rotational correlation time are (2.0021 2.0013 2.0010), (2.15 2.25 4.85) and 4 ns, respectively.

| C <sub>2n</sub> matrices | Concentration | k <sub>1</sub> (μT) | τ <sub>r</sub> ( ns ) |
|--------------------------|---------------|---------------------|-----------------------|
| C <sub>60</sub>          | 0.1 mol%      | -1.14               | 0.25                  |
|                          | 0.5 mol%      | -0.986              | 0.22                  |
|                          | 1 mol%        | -2.70               | 0.59                  |
| C <sub>70</sub>          | 0.1 mol%      | -1.96               | 0.43                  |
|                          | 0.5 mol%      | -1.37               | 0.30                  |
|                          | 1 mol%        | -2.24               | 0.49                  |
| C <sub>78</sub>          | 0.1 mol%      | -8.91               | 0.19                  |
|                          | 0.5 mol%      | -1.36               | 0.30                  |
|                          | 1 mol%        | -1.29               | 0.28                  |
| C <sub>82</sub>          | 0.1 mol%      | -0.640              | 0.14                  |
|                          | 0.5 mol%      | -1.02               | 0.22                  |
|                          | 1 mol%        | -1.45               | 0.31                  |
| C <sub>84</sub>          | 0.1 mol%      | -0.784              | 0.17                  |
|                          | 0.5 mol%      | -0.645              | 0.14                  |
|                          | 1 mol%        | -0.700              | 0.52                  |

**Table S2** Numerical data of k<sub>1</sub> parameter and the rotational correlation time τ<sub>r</sub> calculated by the equation S1.

The linear m<sub>1</sub> contribution (equation 1) is determined avoiding contribution from inhomogeneous broadening and other unspecified interactions.<sup>1</sup> The rotational correlation time τ<sub>r</sub> can be calculated by the equation S1:

$$k_1 = \frac{1}{15} \frac{2}{3} \Delta g \frac{\mu_B B_0}{\hbar} \cdot \frac{2}{3} \Delta a \cdot \left[ 4\tau_r + \frac{3\tau_r}{1 + (\omega\tau_r)^2} \right] \quad (\text{S1})$$

where μ<sub>B</sub>, B<sub>0</sub>, ħ, ω are Bohr magneton, the magnetic field, Planck's constant and the microwave frequency of measurements, respectively. Differences of principle values of the g matrix and the hfi tensor have been determined previously as Δg = g<sub>1</sub> - g<sub>⊥</sub> = 0.007 and Δa = a<sub>1</sub> - a<sub>⊥</sub> = 5 MHz.<sup>2</sup>

- 1 P. Jakes, A. Gembus, K. P. Dinse, and K. Hata, *J. Chem. Phys.*, 2008, **128**.
- 2 M. Rubsam, P. Schweitzer, and K. P. Dinse, *J. Phys. Chem.*, 1996, **100**, 19310.

| Sample                     | Lattice      | <i>a</i><br>(hex) | <i>c</i><br>(hex) | Volume<br>(hex) | <i>a</i><br>(fcc) | <i>a'</i><br>(rhom) | <i>α</i><br>(rhom) | Volume<br>(rhom) | <i>c/a</i> |
|----------------------------|--------------|-------------------|-------------------|-----------------|-------------------|---------------------|--------------------|------------------|------------|
| C <sub>60</sub> +0.1mol%La | fcc          | 1.000             | 2.444             | 2.12            | 1.413             | 0.9984              | 60.1               | 0.706            | 2.444      |
| C <sub>60</sub> +1mol%La   | hcp          | 1.001             | 1.638             | 1.42            |                   |                     |                    |                  | 1.637      |
|                            |              |                   |                   |                 |                   |                     |                    |                  |            |
| C <sub>78</sub> +0.1mol%La | rhombohedral | 1.248             | 3.204             | 4.32            |                   | 1.288               | 57.9               | 1.44             | 2.568      |
| C <sub>78</sub> +1mol%La   |              |                   |                   |                 |                   |                     |                    |                  |            |
|                            |              |                   |                   |                 |                   |                     |                    |                  |            |
| C <sub>82</sub> +0.1mol%La | hcp          | 1.120             | 1.836             | 1.99            |                   |                     |                    |                  | 1.645      |
| C <sub>82</sub> +1mol%La   | rhombohedral | 1.297             | 3.335             | 4.86            |                   | 1.340               | 57.9               | 1.62             | 2.571      |
|                            |              |                   |                   |                 |                   |                     |                    |                  |            |
| C <sub>84</sub> +0.1mol%La | rhombohedral | 1.310             | 3.422             | 5.09            |                   | 1.369               | 57.2               | 1.70             | 2.611      |
| C <sub>84</sub> +1mol%La   |              |                   |                   |                 |                   |                     |                    |                  |            |

**Table S3** Numerical data of crystal structures for C<sub>2n</sub> powder with La@C<sub>82</sub>. All dimensions are in nm, the angles in degrees and the volume in nm<sup>3</sup>. The *a* and *c* axes of the corresponding hexagonal unit cells are given for easier comparison of the respective amount of distortion from the ideal lattices, i.e. from *c/a*=1.633 for hcp and *c/a*=2.449 for fcc lattice. The error of the experimental measurements is less than 0.5 percent.

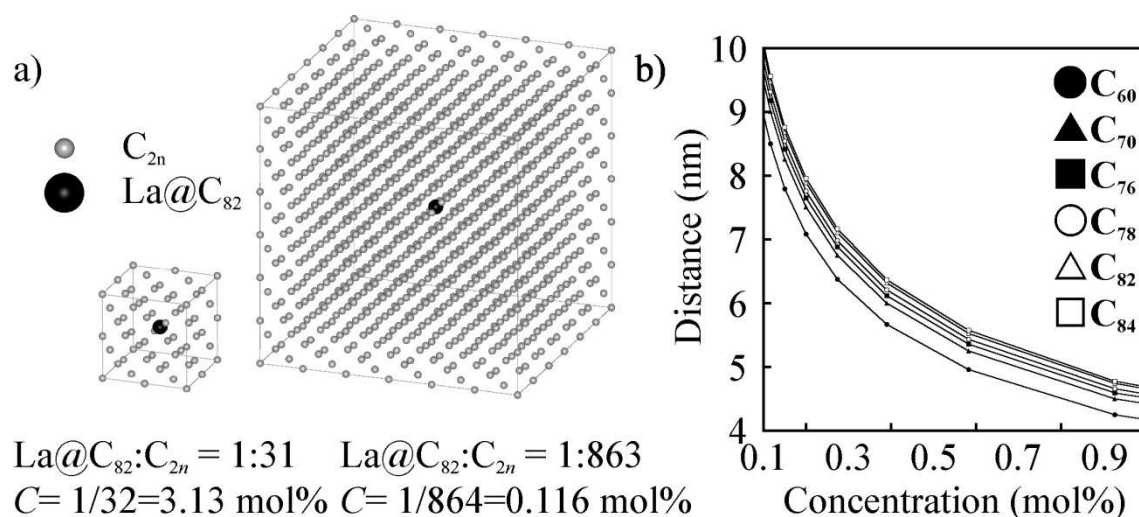

**Fig. S1** a) Schematic model of La@C<sub>82</sub> in C<sub>2n</sub> fcc-crystals; b) Concentration dependence of the distance between La@C<sub>82</sub> molecules in C<sub>2n</sub> fcc-crystals.

In order to determine the range at concentrations to be examined, we calculated the change in average inter-fullerene distance as a function of the concentration. If it is assumed that La@C<sub>82</sub> molecules are dispersed completely by empty fullerene (C<sub>2n</sub>) matrices, that is, La@C<sub>82</sub> molecules are located at the center of C<sub>2n</sub> fcc-crystals (Fig. S1a), the distance  $L$  between La@C<sub>82</sub> molecules is calculated by follows.<sup>3</sup>

$$L = a \times (c / 25)^{1/3} \quad (\text{S2})$$

$$a = 1.31 \times d(\text{C}_{2n}) + 0.492 \quad (\text{S3})$$

$$d(\text{C}_{2n}) = 0.71 \times (2n / 60)^{1/2} \quad (\text{S4})$$

where  $C$ ,  $a$  and  $d(\text{C}_{2n})$  are concentration of La@C<sub>82</sub> (mol%), lattice constant of C<sub>2n</sub> fcc-crystals and diameter of empty fullerenes, respectively. A concentration range between 0.1 → 1 mol% is chosen because in this range, a small variation in the concentration leads to a large change in the inter-fullerene distance.

3 Y. Saito, N. Fujimoto, K. Kikuchi, and Y. Achiba, *Phys. Rev. B*, 1994, **49**, 14794.

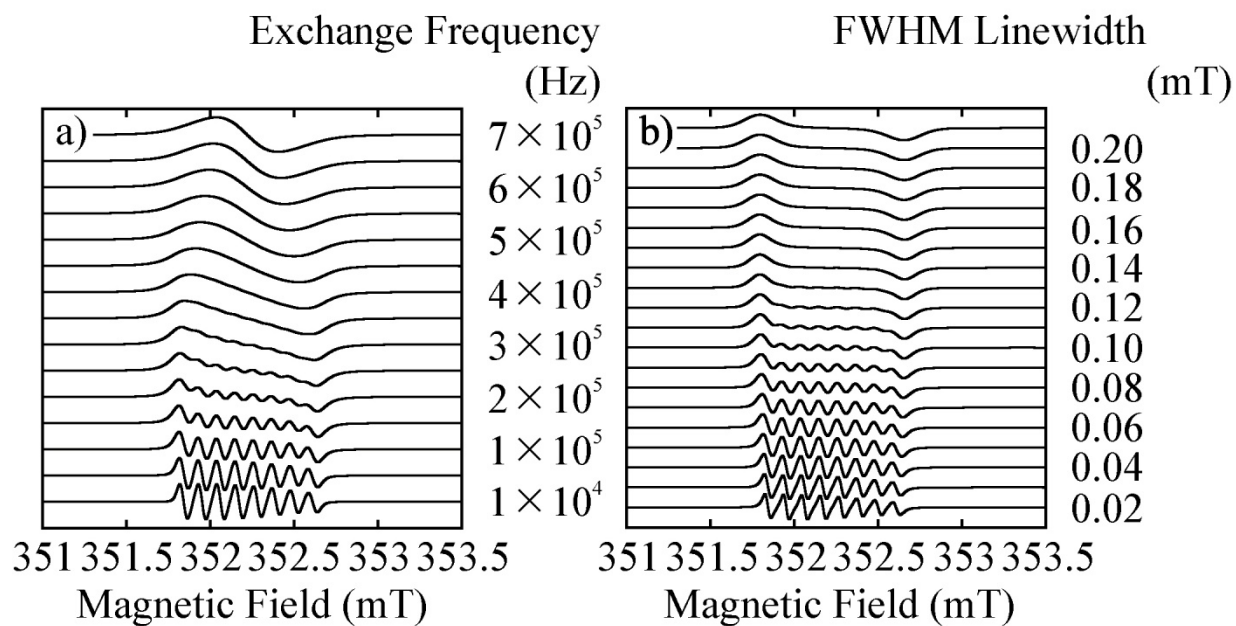

**Fig. S2** a) Exchange frequency; and b) FWHM linewidth dependences of the hyperfine structure of  $\text{La}@C_{82}$ . These spectra are simulated by EasySpin software.<sup>4</sup>

4 S. Stoll and A. Schweiger, *J. Mag. Res.*, 2006, **178**, 42.

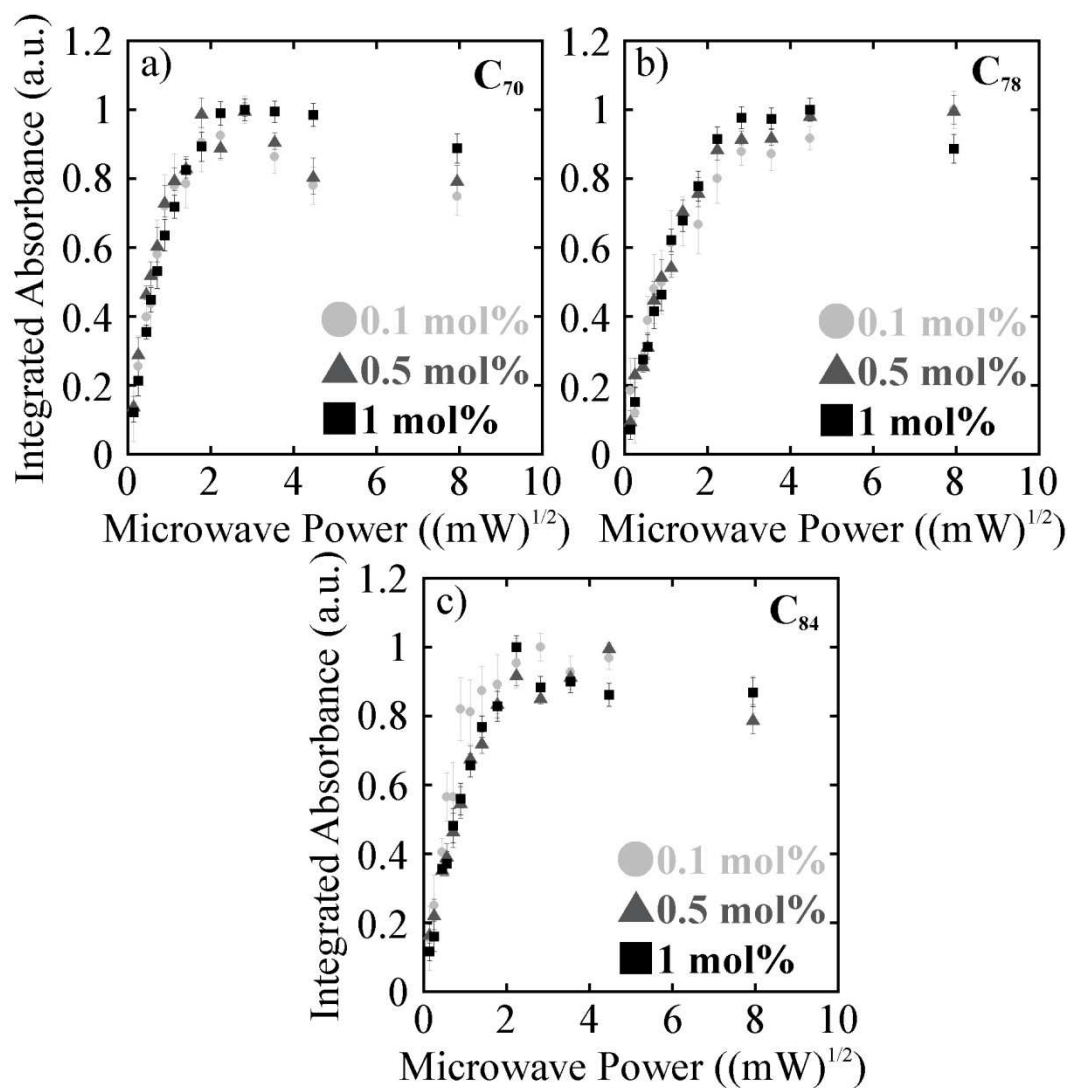

**Fig. S3** Saturation curves of La@C<sub>82</sub> in 0.1, 0.5 and 1 mol% in a)C<sub>70</sub>; b)C<sub>78</sub>; and c)C<sub>84</sub> matrices at room temperature. Microwave frequency and modulation amplitude are 9.867 GHz and 0.025 mT, respectively.

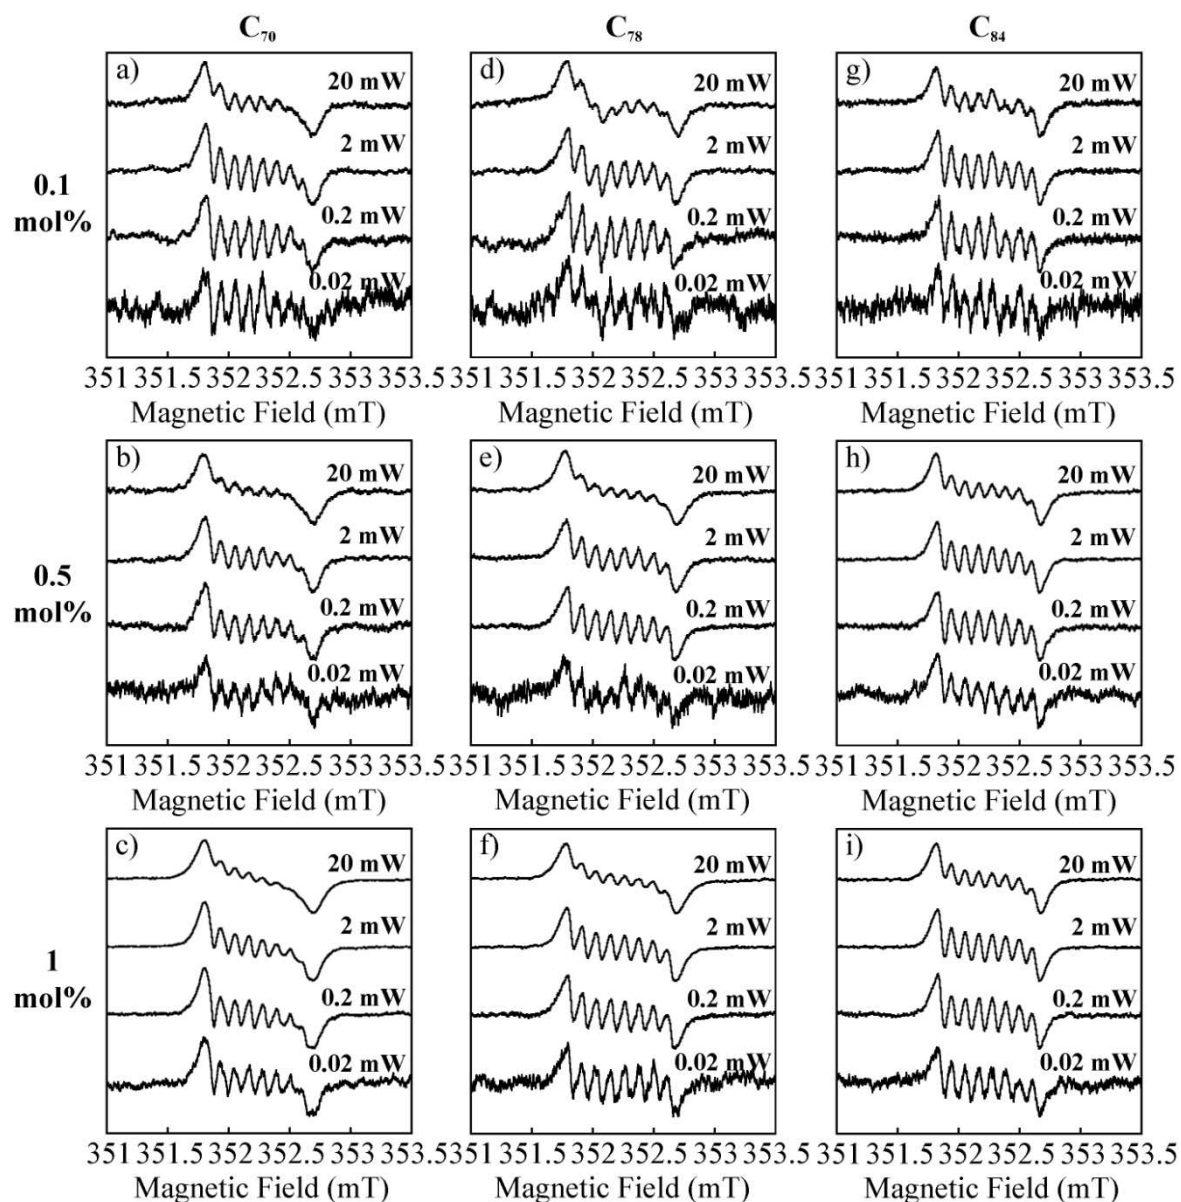

**Fig. S4** Microwave power dependence of the ESR spectra of La@C<sub>82</sub> in a)0.1; b)0.5; c)1 mol% in C<sub>70</sub> matrix; d)0.1; e)0.5; f)1 mol% in C<sub>78</sub> matrix; g)0.1; h)0.5; i)1 mol% in C<sub>84</sub> matrix at room temperature. Microwave frequency and modulation amplitude are 9.867 GHz and 0.025 mT, respectively.
